# Supplementary material for: Electrochemical DNA Cleavage Sensing for EcoRV Activity and Inhibition with an ERGO Electrode
Source: MDPI journal article supplement (doi:10.3390/bios14020073), 2024-01-30

Supplementary Materials

# Electrochemical DNA Cleavage Sensing for EcoRV Activity and Inhibition with an ERGO Electrode

*Da Eun Oh<sup>§</sup>, Hyun Beom Kim<sup>§</sup>, Tae Hyun Kim<sup>\*</sup>*

Department of Chemistry, Soonchunhyang University, Asan 31538, Republic of Korea

<sup>§</sup>These authors contributed equally to this work.

<sup>\*</sup>Correspondence should be addressed to T. H. Kim (thkim@sch.ac.kr)

**Table S1.** Source and recognition site of EcoRV.

| Enzyme | Source           | Recognition Sequence | Cut                  |                      |
|--------|------------------|----------------------|----------------------|----------------------|
| EcoRV  | Escherichia coli | 5'GATATC<br>3'CTATAG | 5'---GAT<br>3'---CTA | ATC---3'<br>TAG---5' |

  

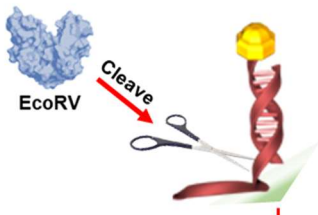

5'-CTA GCT ATG TGC CGA ATT TCA AGG ACA GTT GTA TGG **AT** A TCA TAC T-3'  
3'-ACC **TA** T **AGT** ATG A-5'

**Table S2.** Contact angle measurements of water droplets on each electrode.

|                          | Bare GCE | ERGO-GCE | DNA/ERGO-GCE |
|--------------------------|----------|----------|--------------|
| Average                  | 76.44°   | 79.19°   | 53.25°       |
| Standard Deviation (n=3) | 0.40     | 0.14     | 1.61         |

  





Supplement: s1 [file s1]
